# Supplementary material for: A cost-effective smartphone-based device for rapid C-reaction protein (CRP) detection using magnetoelastic immunosensor
Source: Royal Society of Chemistry journal article supplement (doi:10.1039/d2lc01065h), 2023-01-01
Supplement: d2lc01065h1.pdf [file d2lc01065h1.pdf]

## Supporting Information

**Table S1.** The comparison between smartphone-based CRP-ME detector and vector network analyzer

| Device                | Smartphone-based CRP-ME detector                                                                                                                                                                                                                                                                                                                                                                                                                                                                                                                                      | Vector network analyzer (AV3620A)                                                                                                                                                                |         |         |    |     |         |        |        |         |         |        |      |      |     |     |                                                                                                                                                                                                                                                                                                                                                                                                                                                                                                                                                                   |            |     |   |    |     |         |        |        |         |         |        |      |     |     |     |
|-----------------------|-----------------------------------------------------------------------------------------------------------------------------------------------------------------------------------------------------------------------------------------------------------------------------------------------------------------------------------------------------------------------------------------------------------------------------------------------------------------------------------------------------------------------------------------------------------------------|--------------------------------------------------------------------------------------------------------------------------------------------------------------------------------------------------|---------|---------|----|-----|---------|--------|--------|---------|---------|--------|------|------|-----|-----|-------------------------------------------------------------------------------------------------------------------------------------------------------------------------------------------------------------------------------------------------------------------------------------------------------------------------------------------------------------------------------------------------------------------------------------------------------------------------------------------------------------------------------------------------------------------|------------|-----|---|----|-----|---------|--------|--------|---------|---------|--------|------|-----|-----|-----|
| Test time             | 1-2min<br>(After reagent reaction 35min on chips)                                                                                                                                                                                                                                                                                                                                                                                                                                                                                                                     | 1-2min<br>(After reagent reaction 35min on chips)                                                                                                                                                |         |         |    |     |         |        |        |         |         |        |      |      |     |     |                                                                                                                                                                                                                                                                                                                                                                                                                                                                                                                                                                   |            |     |   |    |     |         |        |        |         |         |        |      |     |     |     |
| Device Cost           | <\$900 (including cellphone)                                                                                                                                                                                                                                                                                                                                                                                                                                                                                                                                          | >\$15000                                                                                                                                                                                         |         |         |    |     |         |        |        |         |         |        |      |      |     |     |                                                                                                                                                                                                                                                                                                                                                                                                                                                                                                                                                                   |            |     |   |    |     |         |        |        |         |         |        |      |     |     |     |
| Communication         | Bluetooth (wireless)                                                                                                                                                                                                                                                                                                                                                                                                                                                                                                                                                  | Cable                                                                                                                                                                                            |         |         |    |     |         |        |        |         |         |        |      |      |     |     |                                                                                                                                                                                                                                                                                                                                                                                                                                                                                                                                                                   |            |     |   |    |     |         |        |        |         |         |        |      |     |     |     |
| Complexity of operate | Self-operation without professional staff                                                                                                                                                                                                                                                                                                                                                                                                                                                                                                                             | At least 1 professional staff help                                                                                                                                                               |         |         |    |     |         |        |        |         |         |        |      |      |     |     |                                                                                                                                                                                                                                                                                                                                                                                                                                                                                                                                                                   |            |     |   |    |     |         |        |        |         |         |        |      |     |     |     |
| Size                  | 100mmx60mmx50mm<br>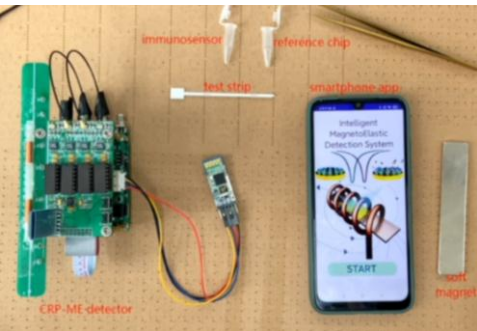<br>                                                                                                                                                                                                                                                                                                                                                                          | 350mmx600mmx200mm<br><br> |         |         |    |     |         |        |        |         |         |        |      |      |     |     |                                                                                                                                                                                                                                                                                                                                                                                                                                                                                                                                                                   |            |     |   |    |     |         |        |        |         |         |        |      |     |     |     |
| Performance           |  <p> <math>y = -412.957x - 107.318</math><br/> <math>R^2 = 0.992</math><br/>                     Table Obtained data from CRP-ME                 </p> <table border="1"> <thead> <tr> <th>CRP(ug/mL)</th> <th>0.1</th> <th>1</th> <th>10</th> <th>100</th> </tr> </thead> <tbody> <tr> <td>RFS(Hz)</td> <td>-316.9</td> <td>-704.2</td> <td>-1085.7</td> <td>-1605.4</td> </tr> <tr> <td>RSD(%)</td> <td>17.1</td> <td>10.1</td> <td>8.2</td> <td>6.9</td> </tr> </tbody> </table> | CRP(ug/mL)                                                                                                                                                                                       | 0.1     | 1       | 10 | 100 | RFS(Hz) | -316.9 | -704.2 | -1085.7 | -1605.4 | RSD(%) | 17.1 | 10.1 | 8.2 | 6.9 |  <p> <math>y = -408.056x - 43.618</math><br/> <math>R^2 = 0.996</math><br/>                     Table obtained data from VNA                 </p> <table border="1"> <thead> <tr> <th>CRP(ug/ml)</th> <th>0.1</th> <th>1</th> <th>10</th> <th>100</th> </tr> </thead> <tbody> <tr> <td>RFS(Hz)</td> <td>-370.0</td> <td>-763.6</td> <td>-1182.0</td> <td>-1594.2</td> </tr> <tr> <td>RSD(%)</td> <td>11.2</td> <td>5.4</td> <td>4.1</td> <td>4.1</td> </tr> </tbody> </table> | CRP(ug/ml) | 0.1 | 1 | 10 | 100 | RFS(Hz) | -370.0 | -763.6 | -1182.0 | -1594.2 | RSD(%) | 11.2 | 5.4 | 4.1 | 4.1 |
| CRP(ug/mL)            | 0.1                                                                                                                                                                                                                                                                                                                                                                                                                                                                                                                                                                   | 1                                                                                                                                                                                                | 10      | 100     |    |     |         |        |        |         |         |        |      |      |     |     |                                                                                                                                                                                                                                                                                                                                                                                                                                                                                                                                                                   |            |     |   |    |     |         |        |        |         |         |        |      |     |     |     |
| RFS(Hz)               | -316.9                                                                                                                                                                                                                                                                                                                                                                                                                                                                                                                                                                | -704.2                                                                                                                                                                                           | -1085.7 | -1605.4 |    |     |         |        |        |         |         |        |      |      |     |     |                                                                                                                                                                                                                                                                                                                                                                                                                                                                                                                                                                   |            |     |   |    |     |         |        |        |         |         |        |      |     |     |     |
| RSD(%)                | 17.1                                                                                                                                                                                                                                                                                                                                                                                                                                                                                                                                                                  | 10.1                                                                                                                                                                                             | 8.2     | 6.9     |    |     |         |        |        |         |         |        |      |      |     |     |                                                                                                                                                                                                                                                                                                                                                                                                                                                                                                                                                                   |            |     |   |    |     |         |        |        |         |         |        |      |     |     |     |
| CRP(ug/ml)            | 0.1                                                                                                                                                                                                                                                                                                                                                                                                                                                                                                                                                                   | 1                                                                                                                                                                                                | 10      | 100     |    |     |         |        |        |         |         |        |      |      |     |     |                                                                                                                                                                                                                                                                                                                                                                                                                                                                                                                                                                   |            |     |   |    |     |         |        |        |         |         |        |      |     |     |     |
| RFS(Hz)               | -370.0                                                                                                                                                                                                                                                                                                                                                                                                                                                                                                                                                                | -763.6                                                                                                                                                                                           | -1182.0 | -1594.2 |    |     |         |        |        |         |         |        |      |      |     |     |                                                                                                                                                                                                                                                                                                                                                                                                                                                                                                                                                                   |            |     |   |    |     |         |        |        |         |         |        |      |     |     |     |
| RSD(%)                | 11.2                                                                                                                                                                                                                                                                                                                                                                                                                                                                                                                                                                  | 5.4                                                                                                                                                                                              | 4.1     | 4.1     |    |     |         |        |        |         |         |        |      |      |     |     |                                                                                                                                                                                                                                                                                                                                                                                                                                                                                                                                                                   |            |     |   |    |     |         |        |        |         |         |        |      |     |     |     |

**Table S2.** ANOVA results of time-dependent frequency responses

|          |                | Sum of Squares | df | Mean Square | F       | Sig. |
|----------|----------------|----------------|----|-------------|---------|------|
| RFS5min  | Between Groups | 1156970.000    | 3  | 385656.667  | 332.739 | .000 |
|          | Within Groups  | 27816.857      | 24 | 1159.036    |         |      |
|          | Total          | 1184786.857    | 27 |             |         |      |
| RFS10min | Between Groups | 1581347.000    | 3  | 527115.667  | 385.910 | .000 |
|          | Within Groups  | 32781.714      | 24 | 1365.905    |         |      |
|          | Total          | 1614128.714    | 27 |             |         |      |
| RFS15min | Between Groups | 3458448.964    | 3  | 1152816.321 | 941.386 | .000 |
|          | Within Groups  | 29390.286      | 24 | 1224.595    |         |      |
|          | Total          | 3487839.250    | 27 |             |         |      |
| RFS20min | Between Groups | 3501851.714    | 3  | 1167283.905 | 692.985 | .000 |
|          | Within Groups  | 40426.286      | 24 | 1684.429    |         |      |
|          | Total          | 3542278.000    | 27 |             |         |      |
| RFS25min | Between Groups | 3416888.714    | 3  | 1138962.905 | 406.190 | .000 |
|          | Within Groups  | 67296.286      | 24 | 2804.012    |         |      |
|          | Total          | 3484185.000    | 27 |             |         |      |
| RFS30min | Between Groups | 5192990.857    | 3  | 1730996.952 | 600.897 | .000 |
|          | Within Groups  | 69136.571      | 24 | 2880.690    |         |      |
|          | Total          | 5262127.429    | 27 |             |         |      |
| RFS35min | Between Groups | 6230557.286    | 3  | 2076852.429 | 778.101 | .000 |
|          | Within Groups  | 64059.143      | 24 | 2669.131    |         |      |
|          | Total          | 6294616.429    | 27 |             |         |      |

**Table S3.** Multiple Comparisons of time-dependent frequency responses

| LSD                |                   |                   |                       |            |      |                                                    |           |
|--------------------|-------------------|-------------------|-----------------------|------------|------|----------------------------------------------------|-----------|
| Dependent Variable | (I) concentration | (J) concentration | Mean Difference (I-J) | Std. Error | Sig. | 95% Confidence Interval<br>Lower Bound Upper Bound |           |
| RFS5min            | .10               | 1.00              | 87.28571*             | 18.19761   | .000 | 49.7277                                            | 124.8437  |
|                    |                   | 10.00             | 292.71429*            | 18.19761   | .000 | 255.1563                                           | 330.2723  |
|                    |                   | 100.00            | 526.85714*            | 18.19761   | .000 | 489.2991                                           | 564.4152  |
|                    | 1.00              | .10               | -87.28571*            | 18.19761   | .000 | -124.8437                                          | -49.7277  |
|                    |                   | 10.00             | 205.42857*            | 18.19761   | .000 | 167.8705                                           | 242.9866  |
|                    |                   | 100.00            | 439.57143*            | 18.19761   | .000 | 402.0134                                           | 477.1295  |
|                    | 10.00             | .10               | -292.71429*           | 18.19761   | .000 | -330.2723                                          | -255.1563 |
|                    |                   | 1.00              | -205.42857*           | 18.19761   | .000 | -242.9866                                          | -167.8705 |
|                    |                   | 100.00            | 234.14286*            | 18.19761   | .000 | 196.5848                                           | 271.7009  |
|                    | 100.00            | .10               | -526.85714*           | 18.19761   | .000 | -564.4152                                          | -489.2991 |
|                    |                   | 1.00              | -439.57143*           | 18.19761   | .000 | -477.1295                                          | -402.0134 |
|                    |                   | 10.00             | -234.14286*           | 18.19761   | .000 | -271.7009                                          | -196.5848 |
| RFS10min           | .10               | 1.00              | 130.42857*            | 19.75496   | .000 | 89.6563                                            | 171.2008  |
|                    |                   | 10.00             | 355.71429*            | 19.75496   | .000 | 314.9420                                           | 396.4865  |
|                    |                   | 100.00            | 625.57143*            | 19.75496   | .000 | 584.7992                                           | 666.3437  |
|                    | 1.00              | .10               | -130.42857*           | 19.75496   | .000 | -171.2008                                          | -89.6563  |
|                    |                   | 10.00             | 225.28571*            | 19.75496   | .000 | 184.5135                                           | 266.0580  |
|                    |                   | 100.00            | 495.14286*            | 19.75496   | .000 | 454.3706                                           | 535.9151  |
|                    | 10.00             | .10               | -355.71429*           | 19.75496   | .000 | -396.4865                                          | -314.9420 |
|                    |                   | 1.00              | -225.28571*           | 19.75496   | .000 | -266.0580                                          | -184.5135 |
|                    |                   | 100.00            | 269.85714*            | 19.75496   | .000 | 229.0849                                           | 310.6294  |
|                    | 100.00            | .10               | -625.57143*           | 19.75496   | .000 | -666.3437                                          | -584.7992 |
|                    |                   | 1.00              | -495.14286*           | 19.75496   | .000 | -535.9151                                          | -454.3706 |
|                    |                   | 10.00             | -269.85714*           | 19.75496   | .000 | -310.6294                                          | -229.0849 |
| RFS15min           | .10               | 1.00              | 145.85714*            | 18.70520   | .000 | 107.2515                                           | 184.4628  |
|                    |                   | 10.00             | 390.57143*            | 18.70520   | .000 | 351.9658                                           | 429.1771  |
|                    |                   | 100.00            | 923.71429*            | 18.70520   | .000 | 885.1087                                           | 962.3199  |
|                    | 1.00              | .10               | -145.85714*           | 18.70520   | .000 | -184.4628                                          | -107.2515 |
|                    |                   | 10.00             | 244.71429*            | 18.70520   | .000 | 206.1087                                           | 283.3199  |
|                    |                   | 100.00            | 777.85714*            | 18.70520   | .000 | 739.2515                                           | 816.4628  |
|                    | 10.00             | .10               | -390.57143*           | 18.70520   | .000 | -429.1771                                          | -351.9658 |
|                    |                   | 1.00              | -244.71429*           | 18.70520   | .000 | -283.3199                                          | -206.1087 |
|                    |                   | 100.00            | 533.14286*            | 18.70520   | .000 | 494.5372                                           | 571.7485  |
|                    | 100.00            | .10               | -923.71429*           | 18.70520   | .000 | -962.3199                                          | -885.1087 |
|                    |                   | 1.00              | -777.85714*           | 18.70520   | .000 | -816.4628                                          | -739.2515 |
|                    |                   | 10.00             | -533.14286*           | 18.70520   | .000 | -571.7485                                          | -494.5372 |
| RFS20min           | .10               | 1.00              | 215.57143*            | 21.93776   | .000 | 170.2941                                           | 260.8487  |
|                    |                   | 10.00             | 472.00000*            | 21.93776   | .000 | 426.7227                                           | 517.2773  |

|          |        |        |              |          |      |            |            |
|----------|--------|--------|--------------|----------|------|------------|------------|
|          |        | 100.00 | 949.00000*   | 21.93776 | .000 | 903.7227   | 994.2773   |
|          | 1.00   | .10    | -215.57143*  | 21.93776 | .000 | -260.8487  | -170.2941  |
|          |        | 10.00  | 256.42857*   | 21.93776 | .000 | 211.1513   | 301.7059   |
|          |        | 100.00 | 733.42857*   | 21.93776 | .000 | 688.1513   | 778.7059   |
|          | 10.00  | .10    | -472.00000*  | 21.93776 | .000 | -517.2773  | -426.7227  |
|          |        | 1.00   | -256.42857*  | 21.93776 | .000 | -301.7059  | -211.1513  |
|          |        | 100.00 | 477.00000*   | 21.93776 | .000 | 431.7227   | 522.2773   |
|          | 100.00 | .10    | -949.00000*  | 21.93776 | .000 | -994.2773  | -903.7227  |
|          |        | 1.00   | -733.42857*  | 21.93776 | .000 | -778.7059  | -688.1513  |
|          |        | 10.00  | -477.00000*  | 21.93776 | .000 | -522.2773  | -431.7227  |
| RFS25min | .10    | 1.00   | 318.42857*   | 28.30453 | .000 | 260.0109   | 376.8462   |
|          |        | 10.00  | 532.42857*   | 28.30453 | .000 | 474.0109   | 590.8462   |
|          |        | 100.00 | 961.42857*   | 28.30453 | .000 | 903.0109   | 1019.8462  |
|          | 1.00   | .10    | -318.42857*  | 28.30453 | .000 | -376.8462  | -260.0109  |
|          |        | 10.00  | 214.00000*   | 28.30453 | .000 | 155.5823   | 272.4177   |
|          |        | 100.00 | 643.00000*   | 28.30453 | .000 | 584.5823   | 701.4177   |
|          | 10.00  | .10    | -532.42857*  | 28.30453 | .000 | -590.8462  | -474.0109  |
|          |        | 1.00   | -214.00000*  | 28.30453 | .000 | -272.4177  | -155.5823  |
|          |        | 100.00 | 429.00000*   | 28.30453 | .000 | 370.5823   | 487.4177   |
|          | 100.00 | .10    | -961.42857*  | 28.30453 | .000 | -1019.8462 | -903.0109  |
|          |        | 1.00   | -643.00000*  | 28.30453 | .000 | -701.4177  | -584.5823  |
|          |        | 10.00  | -429.00000*  | 28.30453 | .000 | -487.4177  | -370.5823  |
| RFS30min | .10    | 1.00   | 381.71429*   | 28.68893 | .000 | 322.5033   | 440.9253   |
|          |        | 10.00  | 651.14286*   | 28.68893 | .000 | 591.9318   | 710.3539   |
|          |        | 100.00 | 1183.14286*  | 28.68893 | .000 | 1123.9318  | 1242.3539  |
|          | 1.00   | .10    | -381.71429*  | 28.68893 | .000 | -440.9253  | -322.5033  |
|          |        | 10.00  | 269.42857*   | 28.68893 | .000 | 210.2175   | 328.6396   |
|          |        | 100.00 | 801.42857*   | 28.68893 | .000 | 742.2175   | 860.6396   |
|          | 10.00  | .10    | -651.14286*  | 28.68893 | .000 | -710.3539  | -591.9318  |
|          |        | 1.00   | -269.42857*  | 28.68893 | .000 | -328.6396  | -210.2175  |
|          |        | 100.00 | 532.00000*   | 28.68893 | .000 | 472.7890   | 591.2110   |
|          | 100.00 | .10    | -1183.14286* | 28.68893 | .000 | -1242.3539 | -1123.9318 |
|          |        | 1.00   | -801.42857*  | 28.68893 | .000 | -860.6396  | -742.2175  |
|          |        | 10.00  | -532.00000*  | 28.68893 | .000 | -591.2110  | -472.7890  |
| RFS35min | .10    | 1.00   | 405.85714*   | 27.61537 | .000 | 348.8618   | 462.8525   |
|          |        | 10.00  | 739.71429*   | 27.61537 | .000 | 682.7190   | 796.7096   |
|          |        | 100.00 | 1287.85714*  | 27.61537 | .000 | 1230.8618  | 1344.8525  |
|          | 1.00   | .10    | -405.85714*  | 27.61537 | .000 | -462.8525  | -348.8618  |
|          |        | 10.00  | 333.85714*   | 27.61537 | .000 | 276.8618   | 390.8525   |
|          |        | 100.00 | 882.00000*   | 27.61537 | .000 | 825.0047   | 938.9953   |
|          | 10.00  | .10    | -739.71429*  | 27.61537 | .000 | -796.7096  | -682.7190  |
|          |        | 1.00   | -333.85714*  | 27.61537 | .000 | -390.8525  | -276.8618  |
|          |        | 100.00 | 548.14286*   | 27.61537 | .000 | 491.1475   | 605.1382   |

|        |       |              |          |      |            |            |
|--------|-------|--------------|----------|------|------------|------------|
| 100.00 | .10   | -1287.85714* | 27.61537 | .000 | -1344.8525 | -1230.8618 |
|        | 1.00  | -882.00000*  | 27.61537 | .000 | -938.9953  | -825.0047  |
|        | 10.00 | -548.14286*  | 27.61537 | .000 | -605.1382  | -491.1475  |

---

\*. The mean difference is significant at the 0.05 level.

**Table S4.** ANOVA results of the specificity comparison experiment

|          |                | Sum of Squares | df | Mean Square | F        | Sig. |
|----------|----------------|----------------|----|-------------|----------|------|
| RFS5min  | Between Groups | 333672.933     | 4  | 83418.233   | 285.483  | .000 |
|          | Within Groups  | 2922.000       | 10 | 292.200     |          |      |
|          | Total          | 336594.933     | 14 |             |          |      |
| RFS10min | Between Groups | 533704.933     | 4  | 133426.233  | 397.102  | .000 |
|          | Within Groups  | 3360.000       | 10 | 336.000     |          |      |
|          | Total          | 537064.933     | 14 |             |          |      |
| RFS15min | Between Groups | 656253.733     | 4  | 164063.433  | 279.114  | .000 |
|          | Within Groups  | 5878.000       | 10 | 587.800     |          |      |
|          | Total          | 662131.733     | 14 |             |          |      |
| RFS20min | Between Groups | 1035114.933    | 4  | 258778.733  | 503.657  | .000 |
|          | Within Groups  | 5138.000       | 10 | 513.800     |          |      |
|          | Total          | 1040252.933    | 14 |             |          |      |
| RFS25min | Between Groups | 1204462.000    | 4  | 301115.500  | 1013.857 | .000 |
|          | Within Groups  | 2970.000       | 10 | 297.000     |          |      |
|          | Total          | 1207432.000    | 14 |             |          |      |
| RFS30min | Between Groups | 1817853.733    | 4  | 454463.433  | 1553.190 | .000 |
|          | Within Groups  | 2926.000       | 10 | 292.600     |          |      |
|          | Total          | 1820779.733    | 14 |             |          |      |
| RFS35min | Between Groups | 2119509.733    | 4  | 529877.433  | 1037.348 | .000 |
|          | Within Groups  | 5108.000       | 10 | 510.800     |          |      |
|          | Total          | 2124617.733    | 14 |             |          |      |

**Table S5.** Multiple Comparisons of the specificity comparison experiment

| LSD                |           |           |                       |            |        |                         |             |         |
|--------------------|-----------|-----------|-----------------------|------------|--------|-------------------------|-------------|---------|
| Dependent Variable | (I) group | (J) group | Mean Difference (I-J) | Std. Error | Sig.   | 95% Confidence Interval |             |         |
|                    |           |           |                       |            |        | Lower Bound             | Upper Bound |         |
| RFS5min            | 1         | 2         | 3.667                 | 13.957     | .798   | -27.43                  | 34.76       |         |
|                    |           | 3         | 2.667                 | 13.957     | .852   | -28.43                  | 33.76       |         |
|                    |           | 4         | 6.333                 | 13.957     | .660   | -24.76                  | 37.43       |         |
|                    |           | 5         | 376.000*              | 13.957     | .000   | 344.90                  | 407.10      |         |
|                    |           | 2         | 1                     | -3.667     | 13.957 | .798                    | -34.76      | 27.43   |
|                    | 2         | 3         | -1.000                | 13.957     | .944   | -32.10                  | 30.10       |         |
|                    |           | 4         | 2.667                 | 13.957     | .852   | -28.43                  | 33.76       |         |
|                    |           | 5         | 372.333*              | 13.957     | .000   | 341.24                  | 403.43      |         |
|                    |           | 3         | 1                     | -2.667     | 13.957 | .852                    | -33.76      | 28.43   |
|                    |           | 2         | 1.000                 | 13.957     | .944   | -30.10                  | 32.10       |         |
|                    | 3         | 4         | 3.667                 | 13.957     | .798   | -27.43                  | 34.76       |         |
|                    |           | 5         | 373.333*              | 13.957     | .000   | 342.24                  | 404.43      |         |
|                    |           | 4         | 1                     | -6.333     | 13.957 | .660                    | -37.43      | 24.76   |
|                    |           | 2         | -2.667                | 13.957     | .852   | -33.76                  | 28.43       |         |
|                    |           | 3         | -3.667                | 13.957     | .798   | -34.76                  | 27.43       |         |
|                    | 4         | 5         | 369.667*              | 13.957     | .000   | 338.57                  | 400.76      |         |
|                    |           | 5         | 1                     | -376.000*  | 13.957 | .000                    | -407.10     | -344.90 |
|                    |           | 2         | -372.333*             | 13.957     | .000   | -403.43                 | -341.24     |         |
|                    |           | 3         | -373.333*             | 13.957     | .000   | -404.43                 | -342.24     |         |
|                    |           | 4         | -369.667*             | 13.957     | .000   | -400.76                 | -338.57     |         |
| RFS10min           | 1         | 2         | 3.667                 | 14.967     | .811   | -29.68                  | 37.01       |         |
|                    |           | 3         | -5.667                | 14.967     | .713   | -39.01                  | 27.68       |         |
|                    |           | 4         | 12.667                | 14.967     | .417   | -20.68                  | 46.01       |         |
|                    |           | 5         | 474.000*              | 14.967     | .000   | 440.65                  | 507.35      |         |
|                    |           | 2         | 1                     | -3.667     | 14.967 | .811                    | -37.01      | 29.68   |
|                    | 2         | 3         | -9.333                | 14.967     | .547   | -42.68                  | 24.01       |         |
|                    |           | 4         | 9.000                 | 14.967     | .561   | -24.35                  | 42.35       |         |
|                    |           | 5         | 470.333*              | 14.967     | .000   | 436.99                  | 503.68      |         |
|                    |           | 3         | 1                     | 5.667      | 14.967 | .713                    | -27.68      | 39.01   |
|                    |           | 2         | 9.333                 | 14.967     | .547   | -24.01                  | 42.68       |         |
|                    | 3         | 4         | 18.333                | 14.967     | .249   | -15.01                  | 51.68       |         |
|                    |           | 5         | 479.667*              | 14.967     | .000   | 446.32                  | 513.01      |         |
|                    |           | 4         | 1                     | -12.667    | 14.967 | .417                    | -46.01      | 20.68   |
|                    |           | 2         | -9.000                | 14.967     | .561   | -42.35                  | 24.35       |         |
|                    |           | 3         | -18.333               | 14.967     | .249   | -51.68                  | 15.01       |         |
|                    | 4         | 5         | 461.333*              | 14.967     | .000   | 427.99                  | 494.68      |         |
|                    |           | 5         | 1                     | -474.000*  | 14.967 | .000                    | -507.35     | -440.65 |
|                    |           | 2         | -470.333*             | 14.967     | .000   | -503.68                 | -436.99     |         |

|          |   |   |           |        |      |         |         |
|----------|---|---|-----------|--------|------|---------|---------|
|          |   | 3 | -479.667* | 14.967 | .000 | -513.01 | -446.32 |
|          |   | 4 | -461.333* | 14.967 | .000 | -494.68 | -427.99 |
| RFS15min | 1 | 2 | 1.667     | 19.796 | .935 | -42.44  | 45.77   |
|          |   | 3 | -3.667    | 19.796 | .857 | -47.77  | 40.44   |
|          |   | 4 | 15.333    | 19.796 | .457 | -28.77  | 59.44   |
|          |   | 5 | 526.000*  | 19.796 | .000 | 481.89  | 570.11  |
|          | 2 | 1 | -1.667    | 19.796 | .935 | -45.77  | 42.44   |
|          |   | 3 | -5.333    | 19.796 | .793 | -49.44  | 38.77   |
|          |   | 4 | 13.667    | 19.796 | .506 | -30.44  | 57.77   |
|          |   | 5 | 524.333*  | 19.796 | .000 | 480.23  | 568.44  |
|          | 3 | 1 | 3.667     | 19.796 | .857 | -40.44  | 47.77   |
|          |   | 2 | 5.333     | 19.796 | .793 | -38.77  | 49.44   |
|          |   | 4 | 19.000    | 19.796 | .360 | -25.11  | 63.11   |
|          |   | 5 | 529.667*  | 19.796 | .000 | 485.56  | 573.77  |
|          | 4 | 1 | -15.333   | 19.796 | .457 | -59.44  | 28.77   |
|          |   | 2 | -13.667   | 19.796 | .506 | -57.77  | 30.44   |
|          |   | 3 | -19.000   | 19.796 | .360 | -63.11  | 25.11   |
|          |   | 5 | 510.667*  | 19.796 | .000 | 466.56  | 554.77  |
|          | 5 | 1 | -526.000* | 19.796 | .000 | -570.11 | -481.89 |
|          |   | 2 | -524.333* | 19.796 | .000 | -568.44 | -480.23 |
|          |   | 3 | -529.667* | 19.796 | .000 | -573.77 | -485.56 |
|          |   | 4 | -510.667* | 19.796 | .000 | -554.77 | -466.56 |
| RFS20min | 1 | 2 | 4.667     | 18.508 | .806 | -36.57  | 45.90   |
|          |   | 3 | 5.333     | 18.508 | .779 | -35.90  | 46.57   |
|          |   | 4 | 17.000    | 18.508 | .380 | -24.24  | 58.24   |
|          |   | 5 | 663.333*  | 18.508 | .000 | 622.10  | 704.57  |
|          | 2 | 1 | -4.667    | 18.508 | .806 | -45.90  | 36.57   |
|          |   | 3 | .667      | 18.508 | .972 | -40.57  | 41.90   |
|          |   | 4 | 12.333    | 18.508 | .520 | -28.90  | 53.57   |
|          |   | 5 | 658.667*  | 18.508 | .000 | 617.43  | 699.90  |
|          | 3 | 1 | -5.333    | 18.508 | .779 | -46.57  | 35.90   |
|          |   | 2 | -.667     | 18.508 | .972 | -41.90  | 40.57   |
|          |   | 4 | 11.667    | 18.508 | .543 | -29.57  | 52.90   |
|          |   | 5 | 658.000*  | 18.508 | .000 | 616.76  | 699.24  |
|          | 4 | 1 | -17.000   | 18.508 | .380 | -58.24  | 24.24   |
|          |   | 2 | -12.333   | 18.508 | .520 | -53.57  | 28.90   |
|          |   | 3 | -11.667   | 18.508 | .543 | -52.90  | 29.57   |
|          |   | 5 | 646.333*  | 18.508 | .000 | 605.10  | 687.57  |
|          | 5 | 1 | -663.333* | 18.508 | .000 | -704.57 | -622.10 |
|          |   | 2 | -658.667* | 18.508 | .000 | -699.90 | -617.43 |
|          |   | 3 | -658.000* | 18.508 | .000 | -699.24 | -616.76 |
|          |   | 4 | -646.333* | 18.508 | .000 | -687.57 | -605.10 |
| RFS25min | 1 | 2 | 10.667    | 14.071 | .466 | -20.69  | 42.02   |



|          |   |   |            |          |      |          |          |
|----------|---|---|------------|----------|------|----------|----------|
|          |   | 3 | 9.667      | 14.071   | .508 | -21.69   | 41.02    |
|          |   | 4 | 13.000     | 14.071   | .377 | -18.35   | 44.35    |
|          |   | 5 | 716.667*   | 14.071   | .000 | 685.31   | 748.02   |
|          | 2 | 1 | -10.667    | 14.071   | .466 | -42.02   | 20.69    |
|          |   | 3 | -1.000     | 14.071   | .945 | -32.35   | 30.35    |
|          |   | 4 | 2.333      | 14.071   | .872 | -29.02   | 33.69    |
|          |   | 5 | 706.000*   | 14.071   | .000 | 674.65   | 737.35   |
|          | 3 | 1 | -9.667     | 14.071   | .508 | -41.02   | 21.69    |
|          |   | 2 | 1.000      | 14.071   | .945 | -30.35   | 32.35    |
|          |   | 4 | 3.333      | 14.071   | .818 | -28.02   | 34.69    |
|          |   | 5 | 707.000*   | 14.071   | .000 | 675.65   | 738.35   |
|          | 4 | 1 | -13.000    | 14.071   | .377 | -44.35   | 18.35    |
|          |   | 2 | -2.333     | 14.071   | .872 | -33.69   | 29.02    |
|          |   | 3 | -3.333     | 14.071   | .818 | -34.69   | 28.02    |
|          |   | 5 | 703.667*   | 14.071   | .000 | 672.31   | 735.02   |
|          | 5 | 1 | -716.667*  | 14.071   | .000 | -748.02  | -685.31  |
|          |   | 2 | -706.000*  | 14.071   | .000 | -737.35  | -674.65  |
|          |   | 3 | -707.000*  | 14.071   | .000 | -738.35  | -675.65  |
|          |   | 4 | -703.667*  | 14.071   | .000 | -735.02  | -672.31  |
| RFS30min | 1 | 2 | 18.333     | 13.967   | .219 | -12.79   | 49.45    |
|          |   | 3 | 12.000     | 13.967   | .410 | -19.12   | 43.12    |
|          |   | 4 | 35.667*    | 13.967   | .029 | 4.55     | 66.79    |
|          |   | 5 | 886.333*   | 13.967   | .000 | 855.21   | 917.45   |
|          | 2 | 1 | -18.333    | 13.967   | .219 | -49.45   | 12.79    |
|          |   | 3 | -6.333     | 13.967   | .660 | -37.45   | 24.79    |
|          |   | 4 | 17.333     | 13.967   | .243 | -13.79   | 48.45    |
|          |   | 5 | 868.000*   | 13.967   | .000 | 836.88   | 899.12   |
|          | 3 | 1 | -12.000    | 13.967   | .410 | -43.12   | 19.12    |
|          |   | 2 | 6.333      | 13.967   | .660 | -24.79   | 37.45    |
|          |   | 4 | 23.667     | 13.967   | .121 | -7.45    | 54.79    |
|          |   | 5 | 874.333*   | 13.967   | .000 | 843.21   | 905.45   |
|          | 4 | 1 | -35.667*   | 13.967   | .029 | -66.79   | -4.55    |
|          |   | 2 | -17.333    | 13.967   | .243 | -48.45   | 13.79    |
|          |   | 3 | -23.667    | 13.967   | .121 | -54.79   | 7.45     |
|          |   | 5 | 850.667*   | 13.967   | .000 | 819.55   | 881.79   |
|          | 5 | 1 | -886.333*  | 13.967   | .000 | -917.45  | -855.21  |
|          |   | 2 | -868.000*  | 13.967   | .000 | -899.12  | -836.88  |
|          |   | 3 | -874.333*  | 13.967   | .000 | -905.45  | -843.21  |
|          |   | 4 | -850.667*  | 13.967   | .000 | -881.79  | -819.55  |
| RFS35min | 1 | 2 | 19.66667   | 18.45355 | .312 | -21.4504 | 60.7837  |
|          |   | 3 | 10.33333   | 18.45355 | .588 | -30.7837 | 51.4504  |
|          |   | 4 | 34.00000   | 18.45355 | .095 | -7.1171  | 75.1171  |
|          |   | 5 | 955.33333* | 18.45355 | .000 | 914.2163 | 996.4504 |

|   |   |             |          |      |           |           |
|---|---|-------------|----------|------|-----------|-----------|
| 2 | 1 | -19.66667   | 18.45355 | .312 | -60.7837  | 21.4504   |
|   | 3 | -9.33333    | 18.45355 | .624 | -50.4504  | 31.7837   |
|   | 4 | 14.33333    | 18.45355 | .455 | -26.7837  | 55.4504   |
|   | 5 | 935.66667*  | 18.45355 | .000 | 894.5496  | 976.7837  |
| 3 | 1 | -10.33333   | 18.45355 | .588 | -51.4504  | 30.7837   |
|   | 2 | 9.33333     | 18.45355 | .624 | -31.7837  | 50.4504   |
|   | 4 | 23.66667    | 18.45355 | .229 | -17.4504  | 64.7837   |
|   | 5 | 945.00000*  | 18.45355 | .000 | 903.8829  | 986.1171  |
| 4 | 1 | -34.00000   | 18.45355 | .095 | -75.1171  | 7.1171    |
|   | 2 | -14.33333   | 18.45355 | .455 | -55.4504  | 26.7837   |
|   | 3 | -23.66667   | 18.45355 | .229 | -64.7837  | 17.4504   |
|   | 5 | 921.33333*  | 18.45355 | .000 | 880.2163  | 962.4504  |
| 5 | 1 | -955.33333* | 18.45355 | .000 | -996.4504 | -914.2163 |
|   | 2 | -935.66667* | 18.45355 | .000 | -976.7837 | -894.5496 |
|   | 3 | -945.00000* | 18.45355 | .000 | -986.1171 | -903.8829 |
|   | 4 | -921.33333* | 18.45355 | .000 | -962.4504 | -880.2163 |

\*. The mean difference is significant at the 0.05 level.

group1—PBS

group2—HSA

group3— $\beta$  2-MG

group4—LYZ

group5—CRP

**Table S6.** ANOVA results of time-dependent frequency responses in simulated blood

|          |                | Sum of Squares | df | Mean Square | F       | Sig. |
|----------|----------------|----------------|----|-------------|---------|------|
| RFS5min  | Between Groups | 247756.286     | 3  | 82585.429   | 143.808 | .000 |
|          | Within Groups  | 13782.571      | 24 | 574.274     |         |      |
|          | Total          | 261538.857     | 27 |             |         |      |
| RFS10min | Between Groups | 456858.393     | 3  | 152286.131  | 203.649 | .000 |
|          | Within Groups  | 17946.857      | 24 | 747.786     |         |      |
|          | Total          | 474805.250     | 27 |             |         |      |
| RFS15min | Between Groups | 782146.571     | 3  | 260715.524  | 320.210 | .000 |
|          | Within Groups  | 19540.857      | 24 | 814.202     |         |      |
|          | Total          | 801687.429     | 27 |             |         |      |
| RFS20min | Between Groups | 1380026.286    | 3  | 460008.762  | 429.351 | .000 |
|          | Within Groups  | 25713.714      | 24 | 1071.405    |         |      |
|          | Total          | 1405740.000    | 27 |             |         |      |
| RFS25min | Between Groups | 2090040.143    | 3  | 696680.048  | 532.078 | .000 |
|          | Within Groups  | 31424.571      | 24 | 1309.357    |         |      |
|          | Total          | 2121464.714    | 27 |             |         |      |
| RFS30min | Between Groups | 2435025.821    | 3  | 811675.274  | 533.663 | .000 |
|          | Within Groups  | 36502.857      | 24 | 1520.952    |         |      |
|          | Total          | 2471528.679    | 27 |             |         |      |
| RFS35min | Between Groups | 2646900.714    | 3  | 882300.238  | 233.189 | .000 |
|          | Within Groups  | 90807.143      | 24 | 3783.631    |         |      |
|          | Total          | 2737707.857    | 27 |             |         |      |

**Table S7.** Multiple Comparisons of time-dependent frequency responses in simulated blood

| LSD       |                   |                   |                 |            |      |                         |             |
|-----------|-------------------|-------------------|-----------------|------------|------|-------------------------|-------------|
| Dependent |                   |                   | Mean            |            |      | 95% Confidence Interval |             |
| Variable  | (I) concentration | (J) concentration | Difference(I-J) | Std. Error | Sig. | Lower Bound             | Upper Bound |
| RFS5min   | .10               | 1.00              | 52.57143*       | 12.80930   | .000 | 26.1343                 | 79.0085     |
|           |                   | 10.00             | 150.42857*      | 12.80930   | .000 | 123.9915                | 176.8657    |
|           |                   | 100.00            | 245.57143*      | 12.80930   | .000 | 219.1343                | 272.0085    |
|           | 1.00              | .10               | -52.57143*      | 12.80930   | .000 | -79.0085                | -26.1343    |
|           |                   | 10.00             | 97.85714*       | 12.80930   | .000 | 71.4200                 | 124.2942    |
|           |                   | 100.00            | 193.00000*      | 12.80930   | .000 | 166.5629                | 219.4371    |
|           | 10.00             | .10               | -150.42857*     | 12.80930   | .000 | -176.8657               | -123.9915   |
|           |                   | 1.00              | -97.85714*      | 12.80930   | .000 | -124.2942               | -71.4200    |
|           |                   | 100.00            | 95.14286*       | 12.80930   | .000 | 68.7058                 | 121.5800    |
|           | 100.00            | .10               | -245.57143*     | 12.80930   | .000 | -272.0085               | -219.1343   |
|           |                   | 1.00              | -193.00000*     | 12.80930   | .000 | -219.4371               | -166.5629   |
|           |                   | 10.00             | -95.14286*      | 12.80930   | .000 | -121.5800               | -68.7058    |
| RFS10min  | .10               | 1.00              | 59.71429*       | 14.61688   | .000 | 29.5465                 | 89.8820     |
|           |                   | 10.00             | 198.00000*      | 14.61688   | .000 | 167.8323                | 228.1677    |
|           |                   | 100.00            | 329.85714*      | 14.61688   | .000 | 299.6894                | 360.0249    |
|           | 1.00              | .10               | -59.71429*      | 14.61688   | .000 | -89.8820                | -29.5465    |
|           |                   | 10.00             | 138.28571*      | 14.61688   | .000 | 108.1180                | 168.4535    |
|           |                   | 100.00            | 270.14286*      | 14.61688   | .000 | 239.9751                | 300.3106    |
|           | 10.00             | .10               | -198.00000*     | 14.61688   | .000 | -228.1677               | -167.8323   |
|           |                   | 1.00              | -138.28571*     | 14.61688   | .000 | -168.4535               | -108.1180   |
|           |                   | 100.00            | 131.85714*      | 14.61688   | .000 | 101.6894                | 162.0249    |
|           | 100.00            | .10               | -329.85714*     | 14.61688   | .000 | -360.0249               | -299.6894   |
|           |                   | 1.00              | -270.14286*     | 14.61688   | .000 | -300.3106               | -239.9751   |
|           |                   | 10.00             | -131.85714*     | 14.61688   | .000 | -162.0249               | -101.6894   |
| RFS15min  | .10               | 1.00              | 105.57143*      | 15.25219   | .000 | 74.0925                 | 137.0504    |
|           |                   | 10.00             | 274.28571*      | 15.25219   | .000 | 242.8067                | 305.7647    |
|           |                   | 100.00            | 439.57143*      | 15.25219   | .000 | 408.0925                | 471.0504    |
|           | 1.00              | .10               | -105.57143*     | 15.25219   | .000 | -137.0504               | -74.0925    |
|           |                   | 10.00             | 168.71429*      | 15.25219   | .000 | 137.2353                | 200.1933    |
|           |                   | 100.00            | 334.00000*      | 15.25219   | .000 | 302.5210                | 365.4790    |
|           | 10.00             | .10               | -274.28571*     | 15.25219   | .000 | -305.7647               | -242.8067   |
|           |                   | 1.00              | -168.71429*     | 15.25219   | .000 | -200.1933               | -137.2353   |
|           |                   | 100.00            | 165.28571*      | 15.25219   | .000 | 133.8067                | 196.7647    |
|           | 100.00            | .10               | -439.57143*     | 15.25219   | .000 | -471.0504               | -408.0925   |
|           |                   | 1.00              | -334.00000*     | 15.25219   | .000 | -365.4790               | -302.5210   |
|           |                   | 10.00             | -165.28571*     | 15.25219   | .000 | -196.7647               | -133.8067   |
| RFS20min  | .10               | 1.00              | 132.85714*      | 17.49616   | .000 | 96.7468                 | 168.9674    |
|           |                   | 10.00             | 356.00000*      | 17.49616   | .000 | 319.8897                | 392.1103    |

|          |        |        |             |          |      |           |           |
|----------|--------|--------|-------------|----------|------|-----------|-----------|
|          |        | 100.00 | 583.14286*  | 17.49616 | .000 | 547.0326  | 619.2532  |
|          | 1.00   | .10    | -132.85714* | 17.49616 | .000 | -168.9674 | -96.7468  |
|          |        | 10.00  | 223.14286*  | 17.49616 | .000 | 187.0326  | 259.2532  |
|          |        | 100.00 | 450.28571*  | 17.49616 | .000 | 414.1754  | 486.3960  |
|          | 10.00  | .10    | -356.00000* | 17.49616 | .000 | -392.1103 | -319.8897 |
|          |        | 1.00   | -223.14286* | 17.49616 | .000 | -259.2532 | -187.0326 |
|          |        | 100.00 | 227.14286*  | 17.49616 | .000 | 191.0326  | 263.2532  |
|          | 100.00 | .10    | -583.14286* | 17.49616 | .000 | -619.2532 | -547.0326 |
|          |        | 1.00   | -450.28571* | 17.49616 | .000 | -486.3960 | -414.1754 |
|          |        | 10.00  | -227.14286* | 17.49616 | .000 | -263.2532 | -191.0326 |
| RFS25min | .10    | 1.00   | 154.14286*  | 19.34172 | .000 | 114.2235  | 194.0622  |
|          |        | 10.00  | 399.85714*  | 19.34172 | .000 | 359.9378  | 439.7765  |
|          |        | 100.00 | 722.85714*  | 19.34172 | .000 | 682.9378  | 762.7765  |
|          | 1.00   | .10    | -154.14286* | 19.34172 | .000 | -194.0622 | -114.2235 |
|          |        | 10.00  | 245.71429*  | 19.34172 | .000 | 205.7949  | 285.6336  |
|          |        | 100.00 | 568.71429*  | 19.34172 | .000 | 528.7949  | 608.6336  |
|          | 10.00  | .10    | -399.85714* | 19.34172 | .000 | -439.7765 | -359.9378 |
|          |        | 1.00   | -245.71429* | 19.34172 | .000 | -285.6336 | -205.7949 |
|          |        | 100.00 | 323.00000*  | 19.34172 | .000 | 283.0807  | 362.9193  |
|          | 100.00 | .10    | -722.85714* | 19.34172 | .000 | -762.7765 | -682.9378 |
|          |        | 1.00   | -568.71429* | 19.34172 | .000 | -608.6336 | -528.7949 |
|          |        | 10.00  | -323.00000* | 19.34172 | .000 | -362.9193 | -283.0807 |
| RFS30min | .10    | 1.00   | 183.57143*  | 20.84605 | .000 | 140.5473  | 226.5956  |
|          |        | 10.00  | 426.28571*  | 20.84605 | .000 | 383.2616  | 469.3098  |
|          |        | 100.00 | 788.00000*  | 20.84605 | .000 | 744.9759  | 831.0241  |
|          | 1.00   | .10    | -183.57143* | 20.84605 | .000 | -226.5956 | -140.5473 |
|          |        | 10.00  | 242.71429*  | 20.84605 | .000 | 199.6902  | 285.7384  |
|          |        | 100.00 | 604.42857*  | 20.84605 | .000 | 561.4044  | 647.4527  |
|          | 10.00  | .10    | -426.28571* | 20.84605 | .000 | -469.3098 | -383.2616 |
|          |        | 1.00   | -242.71429* | 20.84605 | .000 | -285.7384 | -199.6902 |
|          |        | 100.00 | 361.71429*  | 20.84605 | .000 | 318.6902  | 404.7384  |
|          | 100.00 | .10    | -788.00000* | 20.84605 | .000 | -831.0241 | -744.9759 |
|          |        | 1.00   | -604.42857* | 20.84605 | .000 | -647.4527 | -561.4044 |
|          |        | 10.00  | -361.71429* | 20.84605 | .000 | -404.7384 | -318.6902 |
| RFS35min | .10    | 1.00   | 204.71429*  | 32.87913 | .000 | 136.8551  | 272.5735  |
|          |        | 10.00  | 433.71429*  | 32.87913 | .000 | 365.8551  | 501.5735  |
|          |        | 100.00 | 828.14286*  | 32.87913 | .000 | 760.2837  | 896.0021  |
|          | 1.00   | .10    | -204.71429* | 32.87913 | .000 | -272.5735 | -136.8551 |
|          |        | 10.00  | 229.00000*  | 32.87913 | .000 | 161.1408  | 296.8592  |
|          |        | 100.00 | 623.42857*  | 32.87913 | .000 | 555.5694  | 691.2878  |
|          | 10.00  | .10    | -433.71429* | 32.87913 | .000 | -501.5735 | -365.8551 |
|          |        | 1.00   | -229.00000* | 32.87913 | .000 | -296.8592 | -161.1408 |
|          |        | 100.00 | 394.42857*  | 32.87913 | .000 | 326.5694  | 462.2878  |

|        |       |             |          |      |           |           |
|--------|-------|-------------|----------|------|-----------|-----------|
| 100.00 | .10   | -828.14286* | 32.87913 | .000 | -896.0021 | -760.2837 |
|        | 1.00  | -623.42857* | 32.87913 | .000 | -691.2878 | -555.5694 |
|        | 10.00 | -394.42857* | 32.87913 | .000 | -462.2878 | -326.5694 |

---

\*. The mean difference is significant at the 0.05 level.

**Table S8.** ANOVA results of the specificity comparison experiment in simulated blood

|          |                | Sum of Squares | df | Mean Square | F       | Sig. |
|----------|----------------|----------------|----|-------------|---------|------|
| RFS5min  | Between Groups | 123188.550     | 3  | 41062.850   | 134.931 | .000 |
|          | Within Groups  | 4869.200       | 16 | 304.325     |         |      |
|          | Total          | 128057.750     | 19 |             |         |      |
| RFS10min | Between Groups | 223295.750     | 3  | 74431.917   | 279.872 | .000 |
|          | Within Groups  | 4255.200       | 16 | 265.950     |         |      |
|          | Total          | 227550.950     | 19 |             |         |      |
| RFS15min | Between Groups | 411909.750     | 3  | 137303.250  | 546.589 | .000 |
|          | Within Groups  | 4019.200       | 16 | 251.200     |         |      |
|          | Total          | 415928.950     | 19 |             |         |      |
| RFS20min | Between Groups | 676057.750     | 3  | 225352.583  | 464.357 | .000 |
|          | Within Groups  | 7764.800       | 16 | 485.300     |         |      |
|          | Total          | 683822.550     | 19 |             |         |      |
| RFS25min | Between Groups | 840769.800     | 3  | 280256.600  | 551.279 | .000 |
|          | Within Groups  | 8134.000       | 16 | 508.375     |         |      |
|          | Total          | 848903.800     | 19 |             |         |      |
| RFS30min | Between Groups | 950690.800     | 3  | 316896.933  | 554.476 | .000 |
|          | Within Groups  | 9144.400       | 16 | 571.525     |         |      |
|          | Total          | 959835.200     | 19 |             |         |      |
| RFS35min | Between Groups | 1169422.000    | 3  | 389807.333  | 677.425 | .000 |
|          | Within Groups  | 9206.800       | 16 | 575.425     |         |      |
|          | Total          | 1178628.800    | 19 |             |         |      |

**Table S9.** Multiple Comparisons of the specificity comparison experiment in simulated blood

| LSD       |           |                         |                       |            |      |             |             |
|-----------|-----------|-------------------------|-----------------------|------------|------|-------------|-------------|
| Dependent |           | 95% Confidence Interval |                       |            |      |             |             |
| Variable  | (I) group | (J) group               | Mean Difference (I-J) | Std. Error | Sig. | Lower Bound | Upper Bound |
| RFS5min   | 1         | 2                       | -4.600                | 11.033     | .682 | -27.99      | 18.79       |
|           |           | 3                       | -7.800                | 11.033     | .490 | -31.19      | 15.59       |
|           |           | 4                       | 177.000*              | 11.033     | .000 | 153.61      | 200.39      |
|           | 2         | 1                       | 4.600                 | 11.033     | .682 | -18.79      | 27.99       |
|           |           | 3                       | -3.200                | 11.033     | .776 | -26.59      | 20.19       |
|           |           | 4                       | 181.600*              | 11.033     | .000 | 158.21      | 204.99      |
|           | 3         | 1                       | 7.800                 | 11.033     | .490 | -15.59      | 31.19       |
|           |           | 2                       | 3.200                 | 11.033     | .776 | -20.19      | 26.59       |
|           |           | 4                       | 184.800*              | 11.033     | .000 | 161.41      | 208.19      |
|           | 4         | 1                       | -177.000*             | 11.033     | .000 | -200.39     | -153.61     |
|           |           | 2                       | -181.600*             | 11.033     | .000 | -204.99     | -158.21     |
|           |           | 3                       | -184.800*             | 11.033     | .000 | -208.19     | -161.41     |
| RFS10min  | 1         | 2                       | -6.200                | 10.314     | .556 | -28.06      | 15.66       |
|           |           | 3                       | -7.400                | 10.314     | .483 | -29.26      | 14.46       |
|           |           | 4                       | 239.400*              | 10.314     | .000 | 217.54      | 261.26      |
|           | 2         | 1                       | 6.200                 | 10.314     | .556 | -15.66      | 28.06       |
|           |           | 3                       | -1.200                | 10.314     | .909 | -23.06      | 20.66       |
|           |           | 4                       | 245.600*              | 10.314     | .000 | 223.74      | 267.46      |
|           | 3         | 1                       | 7.400                 | 10.314     | .483 | -14.46      | 29.26       |
|           |           | 2                       | 1.200                 | 10.314     | .909 | -20.66      | 23.06       |
|           |           | 4                       | 246.800*              | 10.314     | .000 | 224.94      | 268.66      |
|           | 4         | 1                       | -239.400*             | 10.314     | .000 | -261.26     | -217.54     |
|           |           | 2                       | -245.600*             | 10.314     | .000 | -267.46     | -223.74     |
|           |           | 3                       | -246.800*             | 10.314     | .000 | -268.66     | -224.94     |
| RFS15min  | 1         | 2                       | -1.200                | 10.024     | .906 | -22.45      | 20.05       |
|           |           | 3                       | -4.800                | 10.024     | .639 | -26.05      | 16.45       |
|           |           | 4                       | 329.400*              | 10.024     | .000 | 308.15      | 350.65      |
|           | 2         | 1                       | 1.200                 | 10.024     | .906 | -20.05      | 22.45       |
|           |           | 3                       | -3.600                | 10.024     | .724 | -24.85      | 17.65       |
|           |           | 4                       | 330.600*              | 10.024     | .000 | 309.35      | 351.85      |
|           | 3         | 1                       | 4.800                 | 10.024     | .639 | -16.45      | 26.05       |
|           |           | 2                       | 3.600                 | 10.024     | .724 | -17.65      | 24.85       |
|           |           | 4                       | 334.200*              | 10.024     | .000 | 312.95      | 355.45      |
|           | 4         | 1                       | -329.400*             | 10.024     | .000 | -350.65     | -308.15     |
|           |           | 2                       | -330.600*             | 10.024     | .000 | -351.85     | -309.35     |
|           |           | 3                       | -334.200*             | 10.024     | .000 | -355.45     | -312.95     |
| RFS20min  | 1         | 2                       | -12.800               | 13.933     | .372 | -42.34      | 16.74       |
|           |           | 3                       | -5.400                | 13.933     | .703 | -34.94      | 24.14       |



|          |   |   |            |          |      |          |          |
|----------|---|---|------------|----------|------|----------|----------|
|          |   | 4 | 418.400*   | 13.933   | .000 | 388.86   | 447.94   |
|          | 2 | 1 | 12.800     | 13.933   | .372 | -16.74   | 42.34    |
|          |   | 3 | 7.400      | 13.933   | .603 | -22.14   | 36.94    |
|          |   | 4 | 431.200*   | 13.933   | .000 | 401.66   | 460.74   |
|          | 3 | 1 | 5.400      | 13.933   | .703 | -24.14   | 34.94    |
|          |   | 2 | -7.400     | 13.933   | .603 | -36.94   | 22.14    |
|          |   | 4 | 423.800*   | 13.933   | .000 | 394.26   | 453.34   |
|          | 4 | 1 | -418.400*  | 13.933   | .000 | -447.94  | -388.86  |
|          |   | 2 | -431.200*  | 13.933   | .000 | -460.74  | -401.66  |
|          |   | 3 | -423.800*  | 13.933   | .000 | -453.34  | -394.26  |
| RFS25min | 1 | 2 | -3.400     | 14.260   | .815 | -33.63   | 26.83    |
|          |   | 3 | 3.800      | 14.260   | .793 | -26.43   | 34.03    |
|          |   | 4 | 473.600*   | 14.260   | .000 | 443.37   | 503.83   |
|          | 2 | 1 | 3.400      | 14.260   | .815 | -26.83   | 33.63    |
|          |   | 3 | 7.200      | 14.260   | .621 | -23.03   | 37.43    |
|          |   | 4 | 477.000*   | 14.260   | .000 | 446.77   | 507.23   |
|          | 3 | 1 | -3.800     | 14.260   | .793 | -34.03   | 26.43    |
|          |   | 2 | -7.200     | 14.260   | .621 | -37.43   | 23.03    |
|          |   | 4 | 469.800*   | 14.260   | .000 | 439.57   | 500.03   |
|          | 4 | 1 | -473.600*  | 14.260   | .000 | -503.83  | -443.37  |
|          |   | 2 | -477.000*  | 14.260   | .000 | -507.23  | -446.77  |
|          |   | 3 | -469.800*  | 14.260   | .000 | -500.03  | -439.57  |
| RFS30min | 1 | 2 | -5.800     | 15.120   | .706 | -37.85   | 26.25    |
|          |   | 3 | 1.400      | 15.120   | .927 | -30.65   | 33.45    |
|          |   | 4 | 502.000*   | 15.120   | .000 | 469.95   | 534.05   |
|          | 2 | 1 | 5.800      | 15.120   | .706 | -26.25   | 37.85    |
|          |   | 3 | 7.200      | 15.120   | .640 | -24.85   | 39.25    |
|          |   | 4 | 507.800*   | 15.120   | .000 | 475.75   | 539.85   |
|          | 3 | 1 | -1.400     | 15.120   | .927 | -33.45   | 30.65    |
|          |   | 2 | -7.200     | 15.120   | .640 | -39.25   | 24.85    |
|          |   | 4 | 500.600*   | 15.120   | .000 | 468.55   | 532.65   |
|          | 4 | 1 | -502.000*  | 15.120   | .000 | -534.05  | -469.95  |
|          |   | 2 | -507.800*  | 15.120   | .000 | -539.85  | -475.75  |
|          |   | 3 | -500.600*  | 15.120   | .000 | -532.65  | -468.55  |
| RFS35min | 1 | 2 | -6.40000   | 15.17135 | .679 | -38.5618 | 25.7618  |
|          |   | 3 | -2.00000   | 15.17135 | .990 | -32.3618 | 31.9618  |
|          |   | 4 | 556.20000* | 15.17135 | .000 | 524.0382 | 588.3618 |
|          | 2 | 1 | 6.40000    | 15.17135 | .679 | -25.7618 | 38.5618  |
|          |   | 3 | 6.20000    | 15.17135 | .688 | -25.9618 | 38.3618  |
|          |   | 4 | 562.60000* | 15.17135 | .000 | 530.4382 | 594.7618 |
|          | 3 | 1 | .20000     | 15.17135 | .990 | -31.9618 | 32.3618  |
|          |   | 2 | -6.20000   | 15.17135 | .688 | -38.3618 | 25.9618  |
|          |   | 4 | 556.40000* | 15.17135 | .000 | 524.2382 | 588.5618 |

|   |   |             |          |      |           |           |
|---|---|-------------|----------|------|-----------|-----------|
| 4 | 1 | -556.20000* | 15.17135 | .000 | -588.3618 | -524.0382 |
|   | 2 | -562.60000* | 15.17135 | .000 | -594.7618 | -530.4382 |
|   | 3 | -556.40000* | 15.17135 | .000 | -588.5618 | -524.2382 |

---

\*. The mean difference is significant at the 0.05 level.

Group1—HSA

Group2— $\beta$  2-MG

Group3—LYZ

Group4—CRP
